# Supplementary material for: Responses of an abyssal meiobenthic community to short-term burial with crushed nodule particles in the South-East Pacific
Source: Copernicus journal article supplement (doi:10.5194/bg-2018-489), 2018-12-07
Supplement: Supplementary file 1 [file bg-2018-489-supplement.pdf]

# Responses of an abyssal meiobenthic community to short-term burial with crushed nodule particles in the South-East Pacific

Lisa Mevenkamp, Katja Guilini, Antje Boetius, Johan De Grave, Brecht Laforce, Dimitri Vandenberghe, Laszlo Vincze, Ann Vanreusel

5

## Supplementary Material

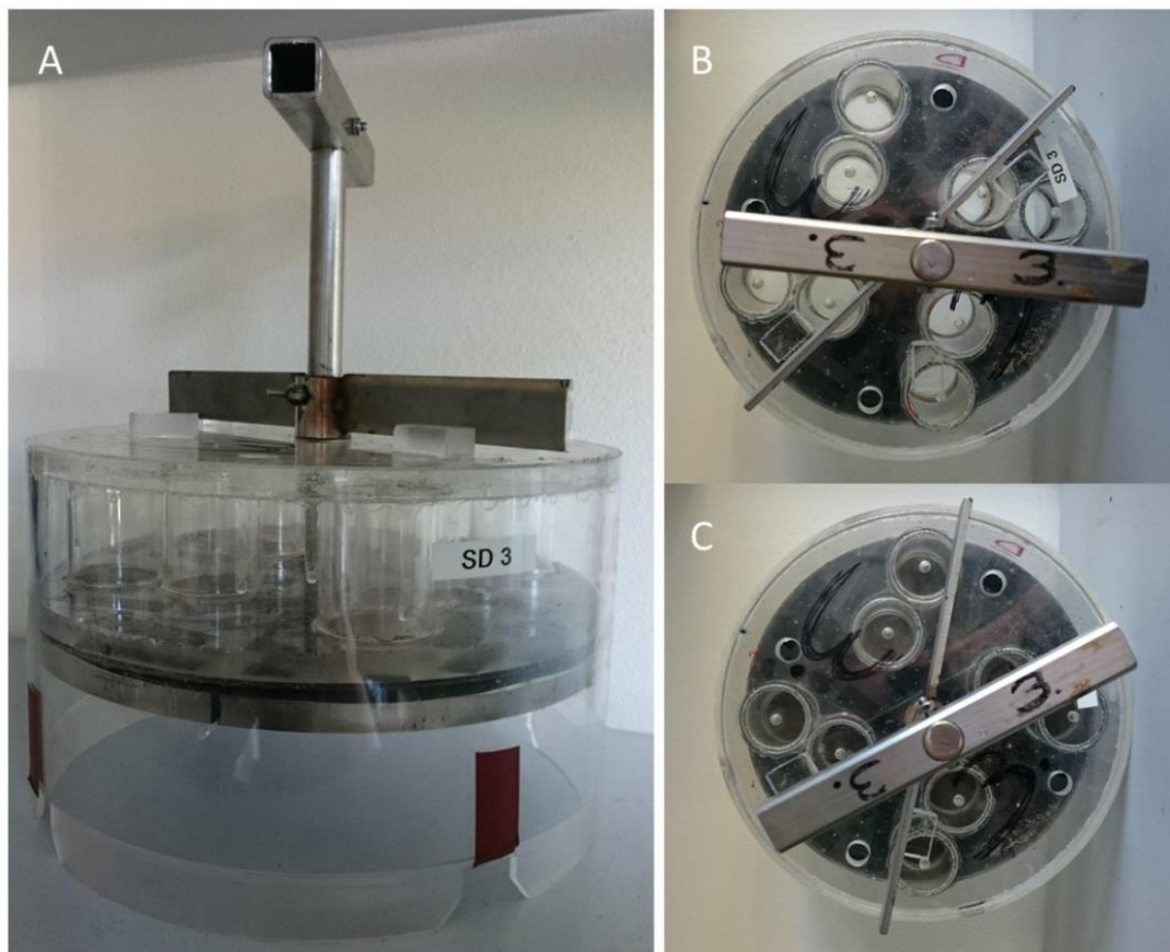

10 **Figure S1 A) Front view on the sediment-dispensing device, sediment is filled in tubes inside the round plexiglass space B) Top view in open position, tubes are visible as big holes and C) Top view in closed position. Holes in the plexiglass cover ensured escape of all air in the device.**

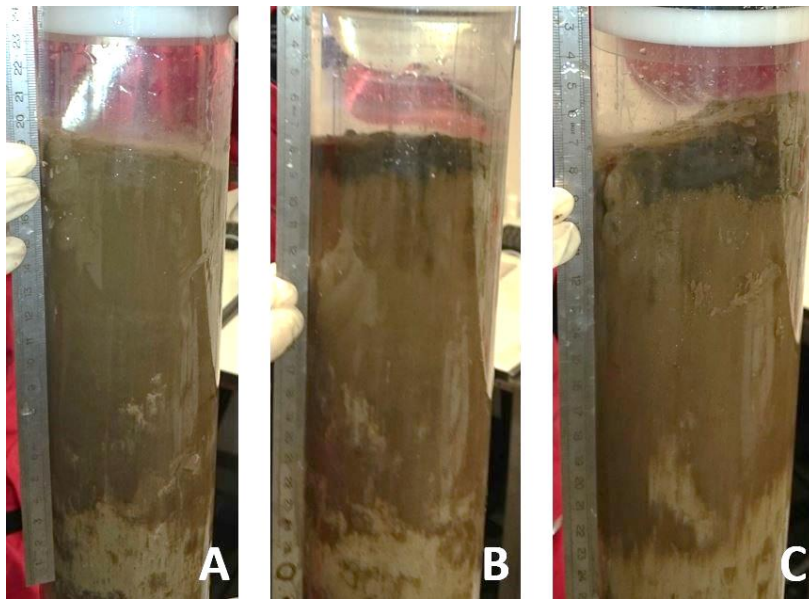

**Figure S2** Pictures of push cores taken at the end of the experiment from the Control treatment (A) and the Burial treatment (B and C). Through its black colour, the layer of crushed nodule debris is easily distinguishable from the underlying sediment.

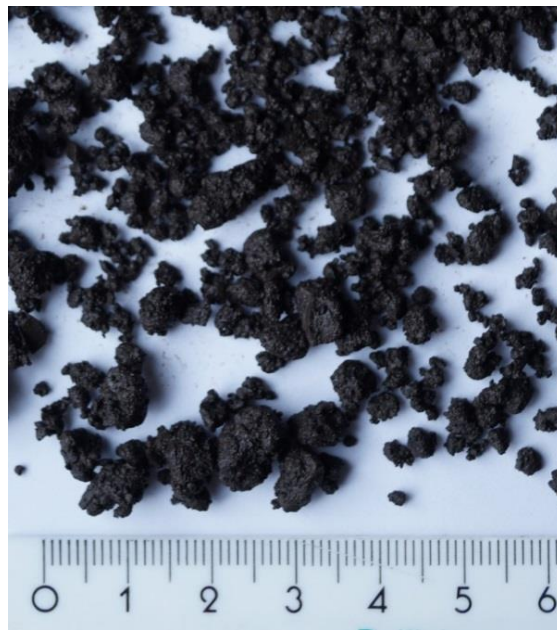

**5 Figure S3** Example of the crushed nodule substrate. Scale in centimetres.

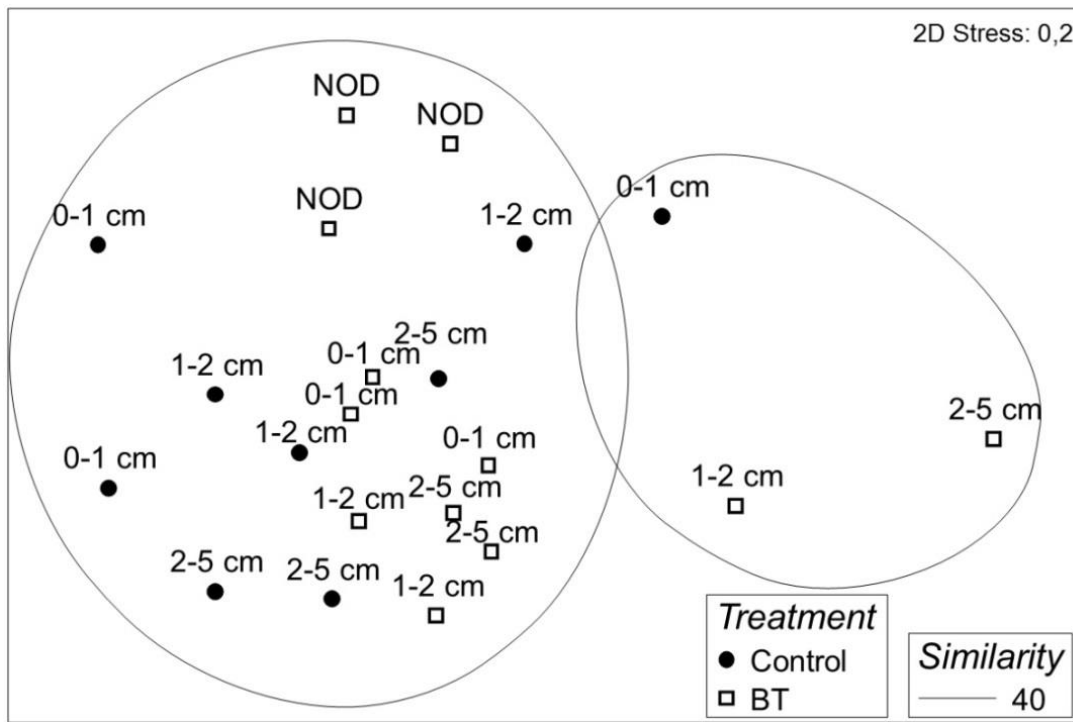

Figure S4 MDS plot of the relative nematode genus composition in each sample of the Control and Burial treatment (BT) per sediment depth layer with overlying contours of significant (SIMPROF test) clusters at a 40 % similarity level. NOD = crushed nodule layer

**Table S1 Mean densities (ind. 10 cm<sup>-2</sup>, ± standard error) and feeding type group of nematode genera found in both treatments of the experiment combining all depth layers.**

| Order                   | Family               | Genus                   | Feeding type             | Control     | Burial treatment |              |
|-------------------------|----------------------|-------------------------|--------------------------|-------------|------------------|--------------|
| Araeolaimida            | Axonolaimidae        | <i>Ascolaimus</i>       | 1B                       |             | 0.17 ± 0.17      |              |
|                         |                      | <i>Cervonema</i>        | 1B                       | 3.57 ± 0.81 | 2.59 ± 0.90      |              |
|                         | Comesomatidae        | <i>Minolaimus</i>       | 1A                       | 0.43 ± 0.43 | 0.29 ± 0.29      |              |
|                         |                      | <i>Pierrickia</i>       | 1B                       | 0.42 ± 0.21 | 0.94 ± 0.04      |              |
|                         |                      | <i>Coninckia</i>        | 1A                       |             | 0.15 ± 0.15      |              |
|                         |                      | <i>Campylaimus</i>      | 1B                       | 0.21 ± 0.21 | 0.15 ± 0.15      |              |
|                         | Diplopeltidae        | <i>Diplopeltula</i>     | 1A                       | 2.29 ± 0.73 | 1.72 ± 0.17      |              |
|                         |                      | <i>Intasia</i>          | 1A                       | 0.62 ± 0.35 |                  |              |
|                         |                      |                         |                          |             |                  |              |
|                         | Chromadorida         | Chromadoridae           | <i>Acantholaimus</i>     | 2A          | 12.49 ± 1.13     | 16.12 ± 2.06 |
| <i>Actinonema</i>       |                      |                         | 2A                       | 1.04 ± 0.41 | 0.78 ± 0.57      |              |
| <i>Chromadora</i>       |                      |                         | 2A                       | 0.62 ± 0.62 | 0.30 ± 0.15      |              |
| <i>Chromadorina</i>     |                      |                         | 2A                       | 0.62 ± 0.36 | 0.48 ± 0.27      |              |
| <i>Endeolophos</i>      |                      |                         | 2A                       |             | 0.47 ± 0.02      |              |
| <i>Hypodontolaimus</i>  |                      |                         | 2A                       |             | 0.16 ± 0.16      |              |
| <i>Prochromadora</i>    |                      |                         | 2A                       |             | 0.15 ± 0.15      |              |
| <i>Prochromadorella</i> |                      |                         | 2A                       | 0.41 ± 0.41 | 0.47 ± 0.47      |              |
| <i>Spilophorella</i>    |                      |                         | 2A                       | 0.42 ± 0.21 | 0.17 ± 0.17      |              |
| Cyatholaimidae          |                      |                         | <i>Acantonchus</i>       | 2A          | 0.43 ± 0.43      |              |
|                         |                      |                         | <i>Longicyatholaimus</i> | 2A          | 0.20 ± 0.20      |              |
|                         |                      |                         | <i>Marylynnia</i>        | 2A          |                  | 0.15 ± 0.15  |
|                         |                      |                         | <i>Paracantonchus</i>    | 2A          |                  | 0.15 ± 0.15  |
|                         |                      | <i>Paracyatholaimus</i> | 2A                       |             | 0.17 ± 0.17      |              |
|                         |                      | <i>Pomponema</i>        | 2B                       | 0.21 ± 0.21 | 0.15 ± 0.15      |              |
|                         |                      | <i>Gomphionchus</i>     |                          |             | 0.17 ± 0.17      |              |
| Neotonchidae            |                      | <i>Synonchiella</i>     | 2B                       | 0.22 ± 0.22 | 0.17 ± 0.17      |              |
| Desmodorida             |                      | Desmodoridae            | <i>Desmodora</i>         | 2A          | 1.70 ± 1.14      | 1.90 ± 0.34  |
|                         |                      |                         | <i>Desmodorella</i>      | 2A          | 0.20 ± 0.20      |              |
|                         |                      |                         | <i>Metadesmodora</i>     | 1B          | 0.21 ± 0.21      |              |
|                         | <i>Molgolaimus</i>   |                         | 1A                       | 0.85 ± 0.57 | 1.23 ± 0.40      |              |
|                         | <i>Paradesmodora</i> |                         | 2A                       | 0.21 ± 0.21 |                  |              |
|                         |                      |                         |                          |             |                  |              |
|                         | Microlaimidae        | <i>Calomicrolaimus</i>  | 2A                       |             | 0.31 ± 0.31      |              |
|                         |                      | <i>Microlaimus</i>      | 2A                       | 1.05 ± 0.55 | 1.62 ± 0.75      |              |
|                         | Desmoscolecida       | Cyartonematidae         | <i>Cyartonema</i>        | 1A          | 0.20 ± 0.20      | 0.49 ± 0.29  |
|                         |                      |                         | <i>Southerniella</i>     | 1A          | 0.63 ± 0.36      | 0.46 ± 0.27  |
| Desmoscolecidae         |                      | <i>Desmoscolex</i>      | 1A                       | 3.31 ± 1.73 | 2.51 ± 1.06      |              |
|                         |                      | <i>Greeffiella</i>      | 1A                       | 0.62 ± 0.35 | 0.96 ± 0.54      |              |
|                         |                      | <i>Hapalomus</i>        | 1A                       |             | 0.31 ± 0.31      |              |
|                         |                      | <i>Tricoma</i>          | 1A                       | 1.24 ± 0.35 | 1.89 ± 1.19      |              |
|                         |                      |                         |                          |             |                  |              |
| Enoplida                | Anticomidae          | <i>Cephalanticoma</i>   | 2A                       |             | 0.16 ± 0.16      |              |
|                         | Enchelidiidae        | <i>Bathyeurystomina</i> | 2B                       | 0.42 ± 0.21 | 0.45 ± 0.25      |              |
|                         |                      | <i>Calyptronema</i>     | 1b                       |             | 0.15 ± 0.15      |              |
|                         | Enoplidae            | <i>Enoploides</i>       | 2B                       | 0.22 ± 0.22 |                  |              |
|                         |                      | <i>Mesacanthion</i>     | 2B                       |             | 0.30 ± 0.15      |              |

|                         |                          |                           |                  |             |              |
|-------------------------|--------------------------|---------------------------|------------------|-------------|--------------|
|                         |                          | <i>Paramesacanthion</i>   | 2B               | 0.21 ± 0.21 | 0.17 ± 0.17  |
|                         | Ironidae                 | <i>Syringolaimus</i>      | 2B               | 1.03 ± 0.55 | 0.94 ± 0.04  |
|                         | Leptosomatidae           | <i>Anticoma</i>           | 1A               | 1.03 ± 0.73 | 0.47 ± 0.02  |
|                         |                          | <i>Anticomopsis</i>       | 1A               |             | 0.17 ± 0.17  |
|                         | Oncholaimidae            | <i>Adoncholaimus</i>      | 2B               |             | 0.16 ± 0.16  |
|                         |                          | <i>Metoncholaimus</i>     | 2B               | 0.20 ± 0.20 |              |
|                         |                          | <i>Meyersia</i>           | 2B               | 0.21 ± 0.21 |              |
|                         |                          | <i>Oncholaimellus</i>     | 2B               |             | 0.15 ± 0.15  |
|                         |                          | <i>Oncholaimus</i>        | 2B               | 0.42 ± 0.21 |              |
|                         | Oxystominidae            | <i>Viscosia</i>           | 2B               | 4.75 ± 3.87 | 11.81 ± 5.37 |
|                         |                          | <i>Cricohalalaimus</i>    | 1A               |             | 0.17 ± 0.17  |
|                         |                          | <i>Halalaimus</i>         | 1A               | 4.20 ± 0.96 | 4.36 ± 0.49  |
|                         |                          | <i>Litinium</i>           | 1A               |             | 1.25 ± 0.32  |
|                         |                          | <i>Nemanema</i>           | 1A               | 0.20 ± 0.20 |              |
|                         | Pelagonematidea          | <i>Oxystomina</i>         | 1A               | 1.48 ± 0.58 | 0.45 ± 0.25  |
|                         |                          | <i>Anoplostoma</i>        | 1B               | 0.21 ± 0.21 | 0.17 ± 0.17  |
|                         | Phanodermatidae          | <i>Phanodermopsis</i>     | 2A               |             | 0.29 ± 0.29  |
|                         | Trefusiidae              | <i>Cytolaimium</i>        | 1B               | 0.21 ± 0.21 |              |
|                         | Tripyloididae            | <i>Bathylaimus</i>        | 1B               | 0.21 ± 0.21 |              |
| Monhysterida            | Linhomoeidae             | <i>Anticyclus</i>         | 2A               | 0.22 ± 0.22 |              |
|                         |                          | <i>Disconema</i>          | 1A               | 0.42 ± 0.21 | 0.16 ± 0.16  |
|                         |                          | <i>Eleutherolaimus</i>    | 1B               | 0.21 ± 0.21 | 0.17 ± 0.17  |
|                         |                          | <i>Metalinhomoeus</i>     | 1B               | 0.21 ± 0.21 | 0.44 ± 0.44  |
|                         |                          | <i>Terschellingia</i>     | 1A               | 0.21 ± 0.21 |              |
|                         | Monhysteridae            | <i>Monhystrella</i>       | 1B               | 9.77 ± 1.58 | 13.14 ± 0.54 |
|                         |                          | <i>Thalassomonhystera</i> | 1B               | 6.07 ± 0.89 | 3.94 ± 0.44  |
|                         | Siphonolaimidae          | <i>Parastomonema</i>      | mouthless        | 0.21 ± 0.21 |              |
|                         |                          | <i>Doliolaimus</i>        | 2B               | 0.20 ± 0.20 |              |
|                         |                          | <i>Metasphaerolaimus</i>  | 2B               | 0.00 ± 0.00 | 0.44 ± 0.44  |
| <i>Sphaerolaimus</i>    |                          | 2B                        | 4.16 ± 0.87      | 2.95 ± 0.30 |              |
| <i>Subsphaerolaimus</i> |                          | 2B                        | 0.82 ± 0.41      | 0.78 ± 0.16 |              |
| Xyalidae                | <i>Ammotheristus</i>     | 1B                        | 0.22 ± 0.22      | 0.15 ± 0.15 |              |
|                         | <i>Amphimonhystera</i>   | 1B                        |                  | 0.16 ± 0.16 |              |
|                         | <i>Amphimonhystrella</i> | 1B                        | 0.20 ± 0.20      | 0.78 ± 0.32 |              |
|                         | <i>Daptonema</i>         | 1B                        | 5.88 ± 1.89      | 2.77 ± 0.95 |              |
|                         | <i>Elzalia</i>           | 1B                        | 0.22 ± 0.22      |             |              |
|                         | <i>Enchonema</i>         | 1B                        | 0.00 ± 0.00      | 0.15 ± 0.15 |              |
|                         | <i>Linhystera</i>        | 1A                        | 1.46 ± 0.55      | 1.69 ± 0.36 |              |
|                         | <i>Manganonema</i>       | 1A                        | 3.15 ± 0.65      | 3.46 ± 0.47 |              |
|                         | <i>Metadesmolaimus</i>   | 1B                        | 0.43 ± 0.43      | 0.15 ± 0.15 |              |
|                         | <i>Paramonhystera</i>    | 1B                        |                  | 0.29 ± 0.29 |              |
| Plectida                | Aegialoalaimidae         | <i>Rhynchonema</i>        | 1B               | 0.22 ± 0.22 |              |
|                         |                          | <i>Theristus</i>          | 1B               | 3.59 ± 1.44 | 2.29 ± 0.83  |
|                         | Aegialoalaimidae         | <i>Aegialoalaimus</i>     | 1A               | 1.66 ± 1.03 | 1.26 ± 0.44  |
|                         |                          | Camacolaimidae            | <i>Alaimella</i> | 1A          | 0.22 ± 0.22  |
|                         | Ceramonematidea          | <i>Camacolaimus</i>       | 2A               | 0.63 ± 0.01 | 0.78 ± 0.16  |
|                         |                          | <i>Ceramonema</i>         | 2A               | 0.20 ± 0.20 |              |
|                         |                          | <i>Dasynemoides</i>       | 1A               | 0.22 ± 0.22 |              |

|                |                       |    |             |             |
|----------------|-----------------------|----|-------------|-------------|
|                | <i>Pselionema</i>     | 1A | 1.47 ± 0.42 | 0.29 ± 0.29 |
| Diplopeltoidea | <i>Diplopeltoidea</i> | 1A | 5.21 ± 2.50 | 1.76 ± 0.70 |
| Haliplectidae  | <i>Setoplectus</i>    | 1A | 0.22 ± 0.22 | 0.29 ± 0.29 |
| Leptolaimidae  | <i>Antomicron</i>     | 1A | 0.21 ± 0.21 | 0.32 ± 0.16 |
|                | <i>Leptolaimus</i>    | 1A | 2.49 ± 0.70 | 0.65 ± 0.45 |
|                | <i>Unknown sp. 1</i>  |    | 0.22 ± 0.22 |             |
|                | <i>Unknown sp. 2</i>  |    |             | 0.63 ± 0.16 |
|                | <i>Unknown sp. 3</i>  |    |             | 0.47 ± 0.47 |
|                | <i>Unknown sp. 4</i>  |    |             | 0.17 ± 0.17 |
|                | <i>Unknown sp. 5</i>  |    |             | 0.15 ± 0.15 |

**Table S2 Results of the SIMPER analysis between the significantly different clusters identified in the dataset of relative abundances of nematode feeding types. Av.Abund = average abundance, Av.Diss = average dissimilarity, Diss/SD = average contribution divided by the standard deviation, Contrib% = Contribution to the dissimilarities, Cum% = Cumulative contribution.**

| Feeding type | Cluster A |          | Cluster C |         | Contrib% | Cum.% |
|--------------|-----------|----------|-----------|---------|----------|-------|
|              | Av.Abund  | Av.Abund | Av.Diss   | Diss/SD |          |       |
| 2B           | 16        | 33       | 9         | 3       | 34       | 34    |
| 2A           | 37        | 21       | 8         | 2       | 30       | 65    |
| 1A           | 30        | 21       | 5         | 2       | 20       | 84    |
| 1B           | 17        | 25       | 4         | 2       | 16       | 100   |

| Feeding type | Cluster A |          | Cluster B |         | Contrib% | Cum.% |
|--------------|-----------|----------|-----------|---------|----------|-------|
|              | Av.Abund  | Av.Abund | Av.Diss   | Diss/SD |          |       |
| 1B           | 17        | 36       | 9         | 2       | 37       | 37    |
| 2A           | 37        | 21       | 8         | 3       | 31       | 68    |
| 1A           | 30        | 34       | 4         | 1       | 16       | 84    |
| 2B           | 16        | 8        | 4         | 2       | 16       | 100   |

| Feeding type | Cluster A |          | Cluster D |         | Contrib% | Cum.% |
|--------------|-----------|----------|-----------|---------|----------|-------|
|              | Av.Abund  | Av.Abund | Av.Diss   | Diss/SD |          |       |
| 2B           | 16        | 67       | 26        | 12      | 48       | 48    |
| 2A           | 37        | 9        | 14        | 8       | 27       | 75    |
| 1A           | 30        | 7        | 12        | 5       | 22       | 96    |

| Feeding type | Cluster B |          | Cluster C |         | Contrib% | Cum.% |
|--------------|-----------|----------|-----------|---------|----------|-------|
|              | Av.Abund  | Av.Abund | Av.Diss   | Diss/SD |          |       |
| 2B           | 8         | 33       | 13        | 4       | 43       | 43    |
| 1A           | 34        | 21       | 7         | 2       | 25       | 69    |
| 1B           | 36        | 25       | 6         | 2       | 20       | 89    |
| 2A           | 21        | 21       | 3         | 1       | 11       | 100   |

| Feeding type | Cluster B |          | Cluster D |         | Contrib% | Cum.% |
|--------------|-----------|----------|-----------|---------|----------|-------|
|              | Av.Abund  | Av.Abund | Av.Diss   | Diss/SD |          |       |
| 2B           | 8         | 67       | 29        | 14      | 50       | 50    |
| 1A           | 34        | 7        | 14        | 3       | 23       | 73    |
| 1B           | 36        | 18       | 9         | 2       | 16       | 89    |
| 2A           | 21        | 9        | 6         | 3       | 11       | 100   |

| Feeding type | Cluster C |          | Cluster D |         | Contrib% | Cum.% |
|--------------|-----------|----------|-----------|---------|----------|-------|
|              | Av.Abund  | Av.Abund | Av.Diss   | Diss/SD |          |       |
| 2B           | 33        | 67       | 17        | 5       | 50       | 50    |

|    |    |    |   |   |    |     |
|----|----|----|---|---|----|-----|
| 1A | 21 | 7  | 7 | 2 | 20 | 70  |
| 2A | 21 | 9  | 6 | 2 | 19 | 89  |
| 1B | 25 | 18 | 4 | 2 | 11 | 100 |
